# Supplementary material
Source: publisher figshare collection journal article supplement (https://acs.figshare.com/ndownloader/files/5773476)
Supplement: Supplementary file 1 [file 5773476]

#       SUPER001:E2_PM3_ESP_MNDO      vs Equilenin_PM3_ESP_MN
#    -110.829 Total      -50.522 Electro    -12.435 Steric     -47.873 Hydro
#	Creation time:		Sat Mar 21 11:35:52 1992

#	Modifying user name:	tom
#	Modification time:	Fri Jun 10 17:04:59 1994

@<TRIPOS>MOLECULE
E2_PM3_ESP_MNDO      vs Equilenin_PM3_ESP_MN
   84    90     1     5     0
SMALL
USER_CHARGES


@<TRIPOS>ATOM
      1 C1         -3.2656    0.1298   -0.5276 C.ar      1 <1>       -0.0913
      2 C2         -4.4744   -0.5486   -0.5221 C.ar      1 <1>       -0.4446
      3 C3         -4.4624   -1.9498   -0.5212 C.ar      1 <1>        0.4666
      4 C4         -3.2550   -2.6549   -0.5255 C.ar      1 <1>       -0.4622
      5 C5         -2.0464   -1.9567   -0.5285 C.ar      1 <1>        0.2063
      6 C6         -0.7806   -2.7529   -0.5097 C.3       1 <1>       -0.1870
      7 C7          0.4533   -1.9395   -0.8618 C.3       1 <1>       -0.1100
      8 C8          0.4323   -0.6178   -0.1111 C.3       1 <1>       -0.0299
      9 C9         -0.7661    0.2245   -0.5949 C.3       1 <1>        0.0883
     10 C10        -2.0480   -0.5553   -0.5272 C.ar      1 <1>       -0.2377
     11 C11        -0.8403    1.5455    0.1806 C.3       1 <1>       -0.1054
     12 C12         0.4562    2.3453    0.0875 C.3       1 <1>       -0.4188
     13 C13         1.6414    1.4945    0.5463 C.3       1 <1>        0.3884
     14 C14         1.6840    0.2216   -0.3361 C.3       1 <1>       -0.0460
     15 C15         3.0586   -0.3733   -0.0464 C.3       1 <1>       -0.2717
     16 C16         3.9720    0.8484    0.1315 C.3       1 <1>       -0.1265
     17 C17         3.0484    2.0890    0.2393 C.3       1 <1>        0.1961
     18 C18         1.5155    1.1778    2.0376 C.3       1 <1>       -0.5449
     19 O3         -5.6038   -2.7062   -0.5173 O.3       1 <1>       -0.6223
     20 O17         3.5706    2.9697    1.2073 O.3       1 <1>       -0.6747
     21 ****       -3.2487    1.2309   -0.5290 H         1 <1>        0.1608
     22 ****       -5.4172    0.0096   -0.5205 H         1 <1>        0.2106
     23 ****       -3.2569   -3.7519   -0.5268 H         1 <1>        0.2482
     24 ****       -0.6701   -3.1890    0.5046 H         1 <1>        0.0734
     25 ****       -0.8708   -3.6149   -1.2006 H         1 <1>        0.0816
     26 ****        1.3698   -2.5085   -0.6085 H         1 <1>        0.0446
     27 ****        0.5040   -1.7590   -1.9542 H         1 <1>        0.0590
     28 ****        0.3237   -0.8212    0.9886 H         1 <1>        0.0954
     29 ****       -0.6119    0.4669   -1.6790 H         1 <1>        0.0623
     30 ****       -1.6941    2.1447   -0.2068 H         1 <1>        0.0774
     31 ****       -1.0839    1.3421    1.2433 H         1 <1>        0.0617
     32 ****        0.6170    2.6904   -0.9539 H         1 <1>        0.0892
     33 ****        0.3784    3.2645    0.7011 H         1 <1>        0.1094
     34 ****        1.6853    0.5372   -1.4126 H         1 <1>        0.0506
     35 ****        3.0384   -1.0017    0.8643 H         1 <1>        0.0958
     36 ****        3.4023   -1.0354   -0.8614 H         1 <1>        0.0864
     37 ****        4.6111    0.7389    1.0283 H         1 <1>        0.0966
     38 ****        4.6672    0.9580   -0.7200 H         1 <1>        0.0663
     39 ****        3.0220    2.6454   -0.7288 H         1 <1>        0.0080
     40 ****        2.4660    0.8203    2.4577 H         1 <1>        0.1441
     41 ****        0.7671    0.3873    2.2158 H         1 <1>        0.1328
     42 ****        1.2099    2.0612    2.6139 H         1 <1>        0.1355
     43 ****       -6.3443   -2.1126   -0.5171 H         1 <1>        0.4382
     44 ****        2.8449    3.5048    1.5019 H         1 <1>        0.3992
     45 C1         -3.3329    0.1184   -0.3516 C.ar      1 GONATRIENE  -0.0014
     46 C2         -4.5039   -0.5865   -0.3858 C.ar      1 GONATRIENE  -0.4676
     47 C3         -4.4679   -2.0047   -0.4930 C.ar      1 GONATRIENE   0.5105
     48 C4         -3.2672   -2.6773   -0.5646 C.ar      1 GONATRIENE  -0.5430
     49 C5         -2.0534   -1.9440   -0.5300 C.ar      1 GONATRIENE   0.3025
     50 C6         -0.8107   -2.6296   -0.6052 C.ar      1 GONATRIENE  -0.2928
     51 C7          0.3619   -1.9309   -0.5815 C.ar      1 GONATRIENE  -0.1368
     52 C8          0.3570   -0.5187   -0.4755 C.ar      1 GONATRIENE  -0.1296
     53 C9         -0.8321    0.1820   -0.3871 C.ar      1 GONATRIENE  -0.0480
     54 C10        -2.0711   -0.5359   -0.4212 C.ar      1 GONATRIENE  -0.1755
     55 C11        -0.8663    1.6746   -0.2286 C.3       1 GONATRIENE   0.0868
     56 C12         0.4816    2.3955   -0.1818 C.3       1 GONATRIENE  -0.5111
     57 C13         1.5738    1.4947    0.3827 C.3       1 GONATRIENE   0.4494
     58 C14         1.6341    0.2471   -0.5276 C.3       1 GONATRIENE   0.1444
     59 C15         2.9587   -0.4171   -0.1581 C.3       1 GONATRIENE  -0.2850
     60 C16         3.9020    0.7536    0.1517 C.3       1 GONATRIENE  -0.1931
     61 C17         3.0282    2.0304    0.2238 C.3       1 GONATRIENE   0.2470
     62 C18         1.2786    1.1598    1.8425 C.3       1 GONATRIENE  -0.4727
     63 ****       -3.3713    1.2115   -0.2707 H         1 GONATRIENE   0.1225
     64 ****       -5.4669   -0.0650   -0.3316 H         1 GONATRIENE   0.2131
     65 O1         -5.6079   -2.7631   -0.5307 O.3       2 OH        -0.6421
     66 ****       -3.2346   -3.7703   -0.6483 H         1 GONATRIENE   0.2699
     67 ****       -0.8115   -3.7226   -0.6849 H         1 GONATRIENE   0.1914
     68 ****        1.3239   -2.4533   -0.6452 H         1 GONATRIENE   0.1563
     69 ****       -1.4214    1.8932    0.7082 H         1 GONATRIENE   0.0491
     70 ****       -1.4726    2.1066   -1.0509 H         1 GONATRIENE   0.0546
     71 ****        0.3899    3.3188    0.4239 H         1 GONATRIENE   0.1108
     72 ****        0.7669    2.7369   -1.1980 H         1 GONATRIENE   0.1058
     73 ****        1.7196    0.5889   -1.5931 H         1 GONATRIENE   0.0135
     74 ****        3.3434   -1.0539   -0.9751 H         1 GONATRIENE   0.0951
     75 ****        2.8448   -1.0846    0.7172 H         1 GONATRIENE   0.0997
     76 ****        4.6794    0.8610   -0.6259 H         1 GONATRIENE   0.0771
     77 ****        4.4474    0.5818    1.0993 H         1 GONATRIENE   0.1115
     78 ****        3.1128    2.6178   -0.7230 H         1 GONATRIENE  -0.0141
     79 ****        0.3696    0.5496    1.9364 H         1 GONATRIENE   0.1172
     80 ****        1.1259    2.0704    2.4378 H         1 GONATRIENE   0.1075
     81 ****        2.1030    0.5975    2.3016 H         1 GONATRIENE   0.1187
     82 O1          3.5002    2.8493    1.2679 O.3       3 OH        -0.6862
     83 ****       -6.3496   -2.1739   -0.4733 H         2 OH         0.4468
     84 ****        2.7975    3.4524    1.4736 H         3 OH         0.3978
@<TRIPOS>BOND
     1    1    2 ar
     2    1   10 ar
     3    2    3 ar
     4    3    4 ar
     5    3   19 1
     6    4    5 ar
     7    5    6 1
     8    5   10 ar
     9    6    7 1
    10    7    8 1
    11    8    9 1
    12    8   14 1
    13    9   10 1
    14    9   11 1
    15   11   12 1
    16   12   13 1
    17   13   14 1
    18   13   17 1
    19   13   18 1
    20   14   15 1
    21   15   16 1
    22   16   17 1
    23   17   20 1
    24    1   21 1
    25    2   22 1
    26    4   23 1
    27    6   24 1
    28    6   25 1
    29    7   26 1
    30    7   27 1
    31    8   28 1
    32    9   29 1
    33   11   30 1
    34   11   31 1
    35   12   32 1
    36   12   33 1
    37   14   34 1
    38   15   35 1
    39   15   36 1
    40   16   37 1
    41   16   38 1
    42   17   39 1
    43   18   40 1
    44   18   41 1
    45   18   42 1
    46   19   43 1
    47   20   44 1
    48   45   46 ar
    49   45   54 ar
    50   46   47 ar
    51   47   48 ar
    52   48   49 ar
    53   49   50 ar
    54   49   54 ar
    55   50   51 ar
    56   51   52 ar
    57   52   53 ar
    58   52   58 1
    59   53   54 ar
    60   53   55 1
    61   55   56 1
    62   56   57 1
    63   57   58 1
    64   57   61 1
    65   58   59 1
    66   59   60 1
    67   60   61 1
    68   45   63 1
    69   46   64 1
    70   48   66 1
    71   50   67 1
    72   51   68 1
    73   55   69 1
    74   55   70 1
    75   56   71 1
    76   56   72 1
    77   58   73 1
    78   59   74 1
    79   59   75 1
    80   60   76 1
    81   60   77 1
    82   57   62 1
    83   61   78 1
    84   62   79 1
    85   62   80 1
    86   62   81 1
    87   65   83 1
    88   82   84 1
    89   47   65 1
    90   61   82 1
@<TRIPOS>SUBSTRUCTURE
     1 ****        1 TEMP              0 ****  ****    0 ROOT
@<TRIPOS>ROTATABLE_BOND
    5     4    46  1 1     0  0
   23    22    47  2 1     0  0
@<TRIPOS>ANCHOR_ATOM
3
@<TRIPOS>NORMAL
@<TRIPOS>CRYSIN
12.055000 19.280001 6.632000 90.000000 90.000000 90.000000 18 1
